# Supplementary material for: The effectiveness of lifestyle interventions on ecological literacy: A contribution to the underlying mechanism in linguistic ecology
Source: PLoS One. 2023 Jun 29;18(6):e0287286. doi: 10.1371/journal.pone.0287286 (PMC10310022; doi:10.1371/journal.pone.0287286)
Supplement: S1 Data — (XLSX) [file pone.0287286.s001.xlsx]

## Sheet: Sheet1
No.	Q1	Q2	Q3	Q4	Q5	Q6	Q7		EKNL	EAWL	EETL	EEML	EBEL	OEL
1	1	1	3	3	3	4	3		28	30	37	34	23	152
2	1	1	1	2	1	1	1		36	40	40	40	31	187
3	1	2	2	3	3	3	3		33	36	40	37	27	173
4	1	2	2	4	4	5	2		29	36	39	36	25	165
5	2	1	1	1	3	2	4		34	35	40	38	23	170
6	1	1	2	4	2	4	4		24	39	40	38	27	168
7	3	2	2	4	4	5	4		27	37	39	33	27	163
8	1	1	2	4	3	4	3		34	31	38	33	27	163
9	1	1	2	4	4	4	3		30	35	39	38	28	170
10	1	1	1	3	3	3	2		32	34	40	39	28	173
11	3	3	3	3	3	3	3		16	26	24	24	24	114
12	1	4	3	3	2	4	5		32	28	27	31	21	139
13	3	1	1	1	2	5	3		33	31	40	37	21	162
14	1	1	1	3	3	3	3		30	35	36	39	27	167
15	5	2	1	5	5	3	5		31	32	36	36	26	161
16	1	1	2	4	3	5	4		35	35	40	39	23	172
17	1	1	1	3	3	4	2		32	38	40	40	31	181
18	4	1	2	4	3	3	4		27	35	39	37	24	162
19	1	1	2	3	3	4	4		29	35	36	39	23	162
20	1	1	1	1	2	3	3		35	37	37	40	30	179
21	1	1	1	2	1	4	3		37	38	40	39	28	182
22	1	2	2	2	1	2	4		34	38	40	38	24	174
23	1	1	1	4	2	4	4		16	37	40	38	28	159
24	3	1	2	3	1	4	3		20	34	35	38	24	151
25	1	1	1	4	2	2	2		40	32	40	40	34	186
26	1	1	1	4	3	3	5		33	39	40	39	28	179
27	1	1	1	4	2	5	5		32	35	40	40	25	172
28	3	3	2	5	5	5	4		23	37	40	32	17	149
29	3	1	2	3	3	3	4		20	29	37	38	27	151
30	1	1	1	4	2	4	4		16	36	40	38	23	153
31	1	1	1	5	3	5	5		27	33	40	35	21	156
32	3	2	2	4	3	4	3		32	38	38	36	21	165
33	1	1	1	2	4	4	3		32	37	40	32	21	162
34	4	1	1	4	1	1	1		21	36	40	36	19	152
35	1	2	2	4	3	5	5		22	33	36	38	27	156
36	1	1	1	2	1	4	4		29	23	36	33	21	142
37	1	2	2	4	4	4	3		29	40	34	39	24	166
38	5	2	5	3	3	4	3		25	27	27	29	29	137
39	1	1	2	3	3	1	3		36	36	37	38	24	171
40	1	1	1	2	2	4	4		16	30	39	39	21	145
41	1	1	1	1	1	3	3		28	37	39	40	29	173
42	3	1	2	4	4	2	3		30	36	40	39	29	174
43	2	2	1	1	4	4	2		31	36	38	36	21	162
44	1	2	1	3	3	3	3		31	36	40	38	26	171
45	2	2	3	4	5	5	5		32	28	33	32	17	142
46	2	2	2	3	3	5	4		32	36	38	37	22	165
47	1	1	1	3	1	1	1		28	33	39	39	36	175
48	5	1	2	5	5	5	5		15	32	38	33	14	132
49	4	1	1	4	4	4	4		15	38	36	34	20	143
50	5	2	5	2	4	5	3		24	27	29	32	23	135
51	1	1	1	1	1	2	3		39	33	37	38	30	177
52	2	1	2	3	4	4	4		30	33	39	33	16	151
53	1	3	3	5	5	5	5		28	31	39	37	23	158
54	2	2	3	5	4	5	5		16	32	39	32	20	139
55	1	1	2	3	2	2	2		38	37	39	40	32	186
56	1	1	1	1	1	4	1		33	34	40	39	33	179
57	3	2	2	4	3	3	3		29	36	40	38	28	171
58	1	1	2	4	3	4	3		26	37	40	39	24	166
59	2	1	2	1	1	3	3		35	37	37	36	27	172
60	3	3	3	2	2	3	3		30	31	36	40	25	162
61	2	1	1	1	1	1	1		22	30	40	40	18	150
62	1	1	1	3	3	3	1		39	36	39	39	38	191
63	1	3	1	4	3	3	3		32	34	40	40	28	174
64	1	1	1	1	2	3	2		39	40	40	40	36	195
65	1	1	2	4	3	3	3		28	31	37	34	22	152
66	4	1	5	3	2	4	4		32	33	37	33	21	156
67	1	1	2	3	3	4	4		31	32	34	36	23	156
68	1	1	1	4	1	1	1		32	34	30	32	37	165
69	1	1	1	3	1	4	4		17	38	36	40	29	160
70	1	1	3	4	4	5	4		31	37	40	33	21	162
71	2	1	1	4	2	3	2		32	36	36	40	33	177
72	1	1	1	4	4	1	4		30	38	36	38	25	167
73	5	1	1	4	3	4	4		18	35	31	32	23	139
74	1	1	2	4	3	2	3		33	34	39	36	25	167
75	2	1	2	3	2	4	5		26	35	32	38	21	152
76	2	2	5	3	5	4	4		21	34	33	35	23	146
77	1	2	2	4	3	5	5		33	38	36	40	23	170
78	1	1	1	3	3	5	5		32	36	39	37	18	162
79	2	2	2	2	4	4	2		32	39	40	39	27	177
80	1	1	1	1	1	1	1		39	34	36	40	36	185
81	5	1	1	4	2	4	4		30	34	39	34	22	159
82	1	1	2	4	4	5	4		29	35	36	30	20	150
83	1	1	1	3	2	4	4		36	36	35	37	24	168
84	1	1	2	3	3	3	2		36	38	38	34	29	175
85	1	1	2	3	3	5	4		32	33	39	37	23	164
86	1	2	3	4	5	5	5		30	34	40	39	18	161
87	1	1	1	1	3	3	1		30	33	40	40	26	169
88	3	1	1	3	1	5	4		30	38	40	37	21	166
89	1	1	1	1	2	5	5		19	27	36	38	22	142
90	2	1	5	4	2	5	5		21	33	39	39	14	146
91	3	2	2	3	2	4	4		21	35	38	39	32	165
92	1	1	1	3	1	1	4		29	34	36	40	34	173
93	1	2	1	4	4	4	4		25	33	36	38	23	155
94	2	1	1	5	3	5	2		28	36	40	40	22	166
95	2	1	4	4	4	4	3		20	28	36	36	26	146
96	1	2	2	2	4	4	3		37	32	34	32	24	159
97	1	2	2	5	4	4	2		32	33	39	38	23	165
98	1	1	1	2	5	5	3		32	39	40	39	26	176
99	1	1	1	4	3	4	3		32	35	35	38	26	166
100	1	1	1	4	4	5	3		34	34	35	40	24	167
101	1	1	3	4	3	4	4		31	30	39	38	23	161
102	2	2	5	3	1	4	4		30	26	29	31	15	131
103	2	2	2	4	4	5	4		18	29	29	32	18	126
104	2	2	2	4	5	4	4		22	25	32	32	26	137
105	2	1	1	3	3	4	4		21	33	38	36	25	153
106	1	2	3	4	4	5	4		21	33	40	36	18	148
107	1	2	2	3	4	4	4		26	31	31	32	30	150
108	4	2	4	3	2	5	5		34	34	40	36	23	167
109	1	1	1	2	3	2	2		32	38	33	40	39	182
110	3	2	3	2	3	4	1		30	28	28	32	29	147
111	2	2	2	2	2	2	2		25	24	24	32	30	135
112	1	2	2	1	3	4	4		33	35	34	39	22	163
113	2	2	2	3	4	4	3		32	37	35	34	30	168
114	2	1	1	2	3	4	3		24	37	34	31	20	146
115	1	2	2	4	3	3	3		32	32	23	34	27	148
116	2	2	5	1	1	4	4		30	27	30	32	21	140
117	2	2	2	4	4	4	4		37	36	31	29	15	148
118	1	2	2	3	4	4	2		38	37	39	38	31	183
119	1	1	1	4	4	5	4		31	37	37	34	22	161
120	4	2	2	2	2	3	2		31	29	34	31	28	153
121	1	1	1	1	1	3	1		38	34	40	40	31	183
122	2	1	2	3	3	4	4		32	33	40	34	24	163
123	1	2	4	4	3	4	2		18	32	33	37	22	142
124	2	2	4	4	5	5	5		22	33	37	26	12	130
125	1	2	2	3	4	4	4		29	31	39	33	29	161
126	2	1	3	2	2	4	5		30	30	34	30	24	148
127	5	1	1	4	2	4	1		29	24	32	36	22	143
128	1	1	1	2	3	3	3		35	35	34	36	25	165
129	1	1	1	3	1	4	3		31	39	40	39	25	174
130	1	1	1	2	2	3	2		32	38	37	37	30	174
131	5	1	1	1	1	5	1		24	24	24	24	24	120
132	2	1	3	2	2	4	4		23	38	38	39	18	156
133	1	2	2	5	2	5	4		27	32	32	30	29	150
134	2	2	5	3	2	4	4		31	32	30	31	24	148
135	1	1	1	3	2	3	3		20	39	39	36	20	154
136	2	2	3	4	3	4	4		25	31	40	33	24	153
137	1	3	3	3	3	4	5		35	29	40	39	22	165
138	3	2	1	3	1	4	4		36	37	39	38	29	179
139	1	1	1	3	3	3	3		35	35	38	38	23	169
140	1	3	2	5	2	4	2		29	27	40	35	24	155
141	4	1	1	3	3	5	4		30	33	35	36	23	157
142	2	2	3	1	5	5	5		26	23	37	30	20	136
143	1	1	2	4	3	4	4		31	34	34	38	25	162
144	2	2	4	4	3	4	4		32	29	30	32	30	153
145	1	2	1	4	4	5	4		26	34	35	38	20	153
146	2	2	1	2	1	3	2		22	25	30	32	26	135
147	1	3	2	3	4	4	4		32	33	39	37	25	166
148	3	3	3	4	4	5	3		24	25	24	24	22	119
149	1	1	1	3	3	4	3		38	30	32	38	24	162
150	2	2	5	2	2	2	2		16	30	30	30	30	136
151	1	1	1	2	4	3	4		33	35	38	38	28	172
152	1	3	2	3	3	4	3		37	34	40	39	29	179
153	1	1	1	3	3	3	3		30	26	27	28	30	141
154	2	1	3	3	3	4	3		16	36	36	36	21	145
155	1	1	2	3	2	3	3		30	29	37	36	23	155
156	2	2	2	4	4	4	4		30	32	29	29	22	142
157	1	1	1	1	2	2	2		33	33	37	39	30	172
158	1	2	2	2	1	4	4		32	33	39	34	23	161
159	2	2	4	1	4	3	4		17	32	30	32	24	135
160	2	2	2	1	5	4	4		33	29	39	35	24	160
161	3	3	3	4	3	3	3		25	24	24	26	24	123
162	1	1	1	2	1	3	3		32	37	39	40	31	179
163	2	2	2	2	2	2	2		16	26	30	32	30	134
164	1	1	1	1	3	4	2		32	38	39	39	32	180
165	2	1	1	3	4	3	1		35	35	40	40	34	184
166	2	2	1	1	1	4	3		32	38	39	37	30	176
167	1	1	1	4	3	4	4		33	34	40	38	31	176
168	1	1	1	3	1	3	3		30	30	40	38	24	162
169	2	2	2	2	2	2	2		32	28	30	32	30	152
170	2	2	2	4	4	4	4		27	34	39	39	23	162
171	1	2	1	3	2	4	3		28	34	39	38	25	164
172	2	2	3	3	5	5	1		8	26	34	33	32	133
173	1	1	1	5	4	4	2		35	39	40	40	29	183
174	1	2	2	3	1	4	2		34	33	39	35	28	169
175	1	1	1	4	4	4	2		26	32	39	37	28	162
176	3	1	1	4	4	4	4		31	37	38	39	25	170
177	2	2	4	3	4	5	5		37	27	31	34	14	143
178	1	1	1	4	5	3	1		39	39	39	40	34	191
179	4	2	2	2	2	4	4		30	34	35	31	21	151
180	1	1	2	3	2	4	4		27	34	40	37	26	164
181	1	1	1	1	1	2	2		35	40	39	39	32	185
182	1	2	2	5	3	5	4		26	38	40	33	25	162
183	1	1	1	4	1	5	3		33	32	40	36	22	163
184	1	3	2	5	5	5	3		31	28	35	37	19	150
185	1	1	1	2	1	5	2		26	32	37	34	26	155
186	1	1	2	1	2	3	2		34	23	33	34	29	153
187	4	5	3	5	3	5	5		24	18	18	23	22	105
188	3	3	3	3	3	5	3		23	24	24	24	24	119
189	1	1	1	4	2	4	2		33	34	39	40	33	179
190	3	2	2	4	3	5	3		30	32	36	33	24	155
191	1	2	2	3	3	1	1		33	32	39	39	35	178
192	1	2	2	4	3	5	4		30	33	37	38	22	160
193	2	2	3	5	5	5	3		23	32	37	36	16	144
194	1	1	1	3	3	4	3		28	38	40	40	27	173
195	3	2	2	4	1	5	3		24	26	37	35	27	149
196	1	2	2	2	4	5	4		31	34	39	36	19	159
197	1	1	1	5	5	4	4		31	36	40	34	20	161
198	4	1	4	4	3	5	4		20	33	40	37	18	148
199	1	1	1	5	4	5	4		34	40	40	40	22	176
200	3	1	3	3	3	4	4		16	20	34	40	21	131
201	2	1	1	3	4	5	3		27	29	40	35	20	151
202	1	1	4	4	4	4	4		31	36	40	34	18	159
203	1	1	1	4	3	2	2		31	38	40	38	30	177
204	1	2	3	4	3	4	3		30	32	35	37	28	162
205	1	1	1	3	3	4	2		34	38	39	39	31	181
206	1	1	1	4	1	4	3		31	36	40	38	26	171
207	2	1	4	2	4	5	4		31	33	37	29	20	150
208	1	2	2	3	2	4	3		32	30	38	33	29	162
209	3	3	3	3	3	3	3		32	33	40	33	23	161
210	1	1	1	2	2	1	2		35	34	40	38	31	178
211	1	1	1	5	5	4	4		28	31	38	37	26	160
212	2	2	4	4	4	4	4		22	33	37	26	20	138
213	1	1	1	3	4	4	4		26	35	40	36	24	161
214	4	1	2	2	3	4	4		27	32	35	32	24	150
215	1	1	2	4	4	5	3		31	36	39	35	23	164
216	1	1	2	3	3	4	3		34	38	35	36	25	168
217	2	2	2	4	4	4	4		25	29	33	29	18	134
218	1	2	2	3	2	3	4		24	37	39	34	17	151
219	1	2	1	3	4	3	3		30	37	40	39	24	170
220	1	1	2	4	2	4	5		29	31	40	38	25	163
221	3	1	5	3	3	3	4		32	27	40	36	19	154
222	3	1	3	3	1	5	4		25	30	37	34	23	149
223	1	2	2	2	3	3	3		32	36	34	35	27	164
224	1	2	2	3	3	4	4		24	36	35	35	23	153
225	2	2	2	4	3	4	4		28	36	39	34	21	158
226	3	1	1	5	3	5	5		29	30	32	34	20	145
227	2	2	2	1	3	4	4		32	28	30	32	21	143
228	2	2	2	2	2	2	2		33	24	40	36	32	165
229	3	3	3	3	3	3	3		32	28	30	32	27	149
230	2	2	2	2	2	4	4		30	28	30	32	22	142
231	3	3	3	3	3	3	3		16	24	24	24	26	114
232	1	1	1	1	1	1	1		40	39	40	40	40	199
233	3	3	3	3	3	3	3		33	30	24	24	25	136
234	1	1	1	1	1	1	1		22	35	40	40	40	177
235	2	3	3	4	4	5	3		32	34	35	31	21	153
236	2	2	2	4	3	3	3		26	24	24	24	27	125
237	1	2	2	3	2	4	2		37	28	37	37	24	163
238	2	1	1	1	4	5	2		36	38	40	39	26	179
239	1	3	2	3	4	4	4		32	33	39	34	23	161
240	5	2	3	3	4	3	3		24	24	24	24	24	120
241	2	3	2	3	2	4	3		21	39	40	37	22	159
242	3	5	1	1	3	4	5		26	26	26	37	19	134
243	1	3	1	3	2	4	3		32	36	39	38	20	165
244	2	2	2	4	3	4	4		36	33	28	32	31	160
245	2	3	4	3	2	5	3		28	33	32	31	20	144
246	3	3	3	3	3	3	3		24	24	24	24	24	120
247	1	1	1	4	3	3	3		33	34	40	37	27	171
248	1	2	1	4	1	3	3		34	36	39	40	30	179
249	1	2	1	3	5	3	2		32	38	35	39	30	174
250	1	1	1	3	5	3	3		31	35	36	40	37	179
251	1	2	2	3	3	2	2		32	30	39	38	29	168
252	3	3	1	2	2	4	2		24	34	37	31	23	149
253	1	2	1	4	2	5	4		24	33	39	40	25	161
254	5	5	2	4	2	5	5		24	24	24	24	19	115
255	3	2	3	1	3	5	5		16	32	40	31	18	137
256	1	1	1	1	3	4	2		32	35	38	40	31	176
257	1	1	1	3	2	3	3		32	32	39	39	32	174
258	1	1	1	4	4	1	3		28	39	40	39	29	175
259	1	4	3	5	4	4	3		26	33	34	29	19	141
260	2	1	1	3	3	5	4		33	33	29	35	19	149
261	1	1	1	1	2	2	2		32	38	40	39	31	180
262	2	2	2	2	3	4	4		24	35	34	34	20	147
263	2	2	2	2	2	2	2		20	31	36	40	33	160
264	1	1	1	3	3	4	4		40	38	40	39	27	184
265	4	1	1	3	5	3	4		22	31	34	34	20	141
266	1	3	1	5	2	5	2		35	33	39	38	27	172
267	1	1	2	4	5	4	4		26	29	40	35	18	148
268	2	2	2	1	2	3	3		27	34	40	37	24	162
269	4	1	2	1	3	4	4		36	36	39	34	21	166
270	2	3	3	4	4	3	3		32	28	31	31	25	147
271	1	2	1	4	2	5	5		28	37	37	37	22	161
272	1	1	2	2	2	3	3		34	30	32	38	32	166
273	2	2	2	2	2	4	4		30	31	35	32	18	146
274	1	2	1	2	3	3	3		35	37	37	36	27	172
275	2	1	1	3	2	4	4		34	37	40	39	32	182
276	2	2	1	5	4	4	3		27	34	37	39	29	166
277	3	3	3	3	3	3	3		32	33	32	38	23	158
278	1	2	2	3	2	3	2		30	36	36	36	32	170
279	1	3	3	5	4	4	4		25	35	40	37	17	154
280	3	1	1	5	5	3	3		24	39	40	39	28	170
281	3	2	2	1	3	4	2		26	35	37	37	20	155
282	1	1	2	3	2	4	2		32	32	38	32	30	164
283	1	2	2	4	4	5	4		28	34	38	37	24	161
284	1	2	2	3	2	4	3		34	34	35	35	26	164
285	3	3	3	4	3	5	3		20	24	36	32	19	131
286	1	2	2	3	3	3	3		32	29	31	32	27	151
287	1	1	1	2	2	3	2		33	38	40	38	26	175
288	1	1	1	2	1	1	2		35	36	37	40	30	178
289	1	1	2	4	2	4	2		36	39	39	38	24	176
290	2	4	3	3	4	5	5		22	33	35	28	15	133
291	1	2	2	2	3	4	4		26	34	36	32	29	157
292	2	3	2	1	1	3	4		32	32	37	34	23	158
293	1	2	2	3	2	4	3		28	31	38	38	23	158
294	1	2	2	3	4	5	5		32	37	38	33	19	159
295	2	3	3	4	4	5	5		25	32	36	29	17	139
296	2	1	2	2	3	5	3		23	31	37	31	23	145
297	1	2	2	4	3	3	3		33	32	37	37	26	165
298	1	2	2	2	3	4	4		29	35	34	31	21	150
299	1	2	2	3	4	4	2		31	34	35	32	22	154
300	1	1	1	4	3	4	3		37	39	40	38	24	178
301	3	1	1	3	2	4	3		26	38	40	38	26	168
302	1	3	4	4	4	3	2		29	34	39	33	18	153
303	2	2	2	4	5	4	4		28	36	37	32	21	154
304	2	3	1	3	1	3	3		26	31	36	38	31	162
305	1	2	1	4	4	2	4		32	35	35	32	26	160
306	2	1	1	2	2	3	4		28	36	35	39	28	166
307	2	3	2	4	4	3	5		30	35	40	36	25	166
308	1	1	1	2	3	4	2		35	33	33	33	34	168
309	2	3	2	4	4	5	4		24	29	34	30	21	138
310	2	3	2	4	5	5	4		26	31	31	29	20	137
311	1	1	4	2	5	3	2		31	33	39	34	23	160
312	1	1	1	4	2	5	3		30	32	38	37	27	164
313	1	1	1	3	4	4	2		33	37	36	38	30	174
314	1	3	2	3	3	2	2		24	33	35	40	31	163
315	2	2	3	3	4	4	4		31	36	38	34	25	164
316	1	1	1	3	2	3	2		30	30	40	40	28	168
317	1	1	2	2	4	4	3		34	35	39	38	28	174
318	2	2	2	1	2	5	3		31	35	34	35	27	162
319	1	1	3	2	4	3	4		29	30	39	35	23	156
320	2	1	1	3	2	4	4		26	33	39	37	20	155
321	2	2	4	3	3	4	4		28	30	34	25	19	136
322	2	1	2	4	3	5	4		32	32	36	34	24	158
323	1	1	2	1	2	1	3		33	37	39	39	27	175
324	1	1	1	2	2	4	4		32	33	38	32	22	157
325	1	2	2	1	2	4	4		32	34	38	36	20	160
326	1	2	3	4	4	4	3		31	34	40	38	18	161
327	1	1	2	2	3	4	4		34	33	39	35	23	164
328	1	1	2	4	5	3	4		34	37	39	37	20	167
329	4	4	5	4	3	4	4		20	30	31	30	22	133
330	1	3	1	3	2	5	5		22	30	39	36	23	150
331	2	3	4	4	4	5	5		24	34	39	35	16	148
332	4	2	2	5	5	5	4		20	38	39	35	20	152
333	1	2	1	4	3	4	4		34	37	39	38	24	172
334	1	1	2	4	3	5	4		31	34	37	32	19	153
335	1	1	3	3	3	4	4		23	31	34	34	26	148
336	4	1	1	3	3	4	3		26	34	40	36	19	155
337	1	1	2	3	4	5	3		32	26	37	35	25	155
338	3	1	2	3	3	4	4		24	29	39	25	19	136
339	1	1	1	3	1	4	3		35	34	40	39	27	175
340	1	1	4	2	4	5	5		24	39	40	36	22	161
341	1	1	2	3	3	4	2		34	38	38	35	23	168
342	3	2	2	4	2	4	3		30	34	40	39	26	169
343	1	1	3	4	2	4	3		21	39	40	39	24	163
344	1	2	2	4	2	2	4		31	38	37	37	27	170
345	2	1	2	4	5	4	3		22	31	36	33	20	142
346	2	2	2	4	3	4	2		25	38	39	37	22	161
347	1	3	2	3	3	3	3		30	32	38	39	28	167
348	1	1	1	2	3	3	2		32	34	36	38	30	170
349	2	2	2	4	4	5	3		31	30	32	32	25	150
350	4	2	1	4	3	4	3		30	28	39	37	24	158
351	2	2	2	2	2	3	3		34	29	31	30	25	149
352	5	1	1	1	5	1	5		20	20	25	22	29	116
353	3	1	3	4	3	4	4		29	24	26	34	29	142
354	3	3	1	3	2	2	2		30	34	38	37	25	164
355	1	1	1	1	1	1	1		33	35	40	40	28	176
356	1	1	1	4	4	4	3		28	36	39	36	23	162
357	1	1	1	4	3	2	2		32	34	37	32	32	167
358	4	2	2	4	3	4	4		22	28	37	34	22	143
359	3	2	4	2	2	3	3		32	32	33	35	26	158
360	1	3	1	2	3	3	3		31	38	38	39	24	170
361	2	2	2	3	3	4	3		27	36	31	39	27	160
362	2	2	1	1	4	3	3		26	35	37	37	20	155
363	1	2	2	1	4	4	4		32	28	39	38	31	168
364	1	2	1	3	5	4	3		33	34	37	40	33	177
365	4	2	2	5	4	5	4		22	31	32	31	21	137
366	1	1	1	2	2	3	1		40	34	40	38	36	188
367	3	2	2	3	4	3	3		32	31	30	33	21	147
368	1	1	4	3	1	4	4		28	32	38	33	22	153
369	2	2	2	1	3	4	4		30	34	29	32	23	148
370	1	1	1	1	4	1	4		34	38	39	38	30	179
371	1	3	1	5	5	2	3		26	33	39	36	29	163
372	3	2	1	4	2	4	4		31	32	36	40	26	165
373	1	2	2	3	2	4	3		30	32	40	32	27	161
374	2	3	4	4	4	4	4		29	35	39	37	21	161
375	1	1	2	1	1	4	1		26	39	34	33	24	156
376	3	1	1	1	5	3	3		19	23	27	33	30	132
377	1	1	2	4	3	4	3		34	35	39	35	24	167
378	1	1	2	3	3	4	4		26	31	40	38	22	157
379	1	1	2	2	3	3	3		35	38	39	36	26	174
380	1	3	2	3	4	3	3		32	38	38	36	28	172
381	1	3	2	3	2	4	4		39	35	39	37	24	174
382	1	3	1	3	1	1	1		39	34	38	39	31	181
383	1	2	2	4	2	4	3		33	34	38	37	27	169
384	4	1	2	4	2	5	4		32	33	35	39	24	163
385	1	3	2	5	5	5	4		29	38	35	38	32	172
386	2	1	2	3	3	4	4		31	31	38	29	21	150
387	1	3	4	5	4	5	4		29	31	35	32	20	147
388	2	2	2	1	1	4	4		27	28	31	30	20	136
389	2	2	2	4	3	2	3		29	35	32	38	23	157
390	1	1	1	2	2	4	4		26	32	34	32	23	147
391	2	3	2	2	5	5	5		27	32	39	37	20	155
392	1	1	2	4	3	3	3		30	32	29	37	24	152
393	1	1	5	3	4	5	4		26	34	37	33	23	153
394	1	1	2	2	3	5	4		30	33	40	36	20	159
395	2	2	2	5	4	4	3		32	35	35	32	23	157
396	3	2	1	3	1	3	2		30	30	30	37	28	155
397	1	2	2	4	2	2	3		33	35	36	31	29	164
398	1	1	1	2	1	4	3		31	36	37	37	30	171
399	1	3	2	2	4	4	4		32	28	30	32	28	150
400	1	1	1	2	1	3	3		32	34	34	37	34	171
401	1	3	2	3	3	3	3		34	34	35	40	32	175
402	3	1	2	1	3	4	4		31	36	37	34	24	162
403	1	1	1	3	4	3	2		31	34	39	37	30	171
404	4	2	2	4	3	4	4		26	30	31	32	27	146
405	1	3	2	3	3	4	4		31	32	37	36	19	155
406	1	1	1	3	4	5	4		29	36	37	35	23	160
407	1	1	1	1	4	4	3		29	36	40	39	31	175
408	1	2	2	1	2	4	4		32	34	39	31	24	160
409	1	1	2	2	2	2	2		21	25	33	38	35	152
410	4	1	1	4	3	4	4		18	39	38	36	24	155
411	1	2	3	5	5	5	5		29	28	40	32	19	148
412	2	2	2	1	1	3	2		31	38	40	38	26	173
413	1	1	1	4	3	4	5		27	39	38	39	24	167
414	3	1	1	3	2	4	4		25	36	40	40	20	161
415	1	1	3	1	5	5	3		26	35	40	36	28	165
416	1	1	1	3	3	4	4		18	32	40	38	22	150
417	1	1	2	3	4	5	2		31	34	39	39	27	170
418	1	2	3	1	5	5	4		31	31	40	35	25	162
419	1	1	2	4	3	4	4		21	28	34	33	24	140
420	3	1	2	3	2	5	5		26	31	30	32	21	140
421	2	1	1	3	1	2	4		27	34	40	40	20	161
422	1	1	2	1	3	5	4		26	38	40	37	23	164
423	1	1	2	3	3	5	5		30	34	39	35	19	157
424	2	4	4	2	4	3	3		27	29	28	34	20	138
425	1	1	1	2	3	4	4		40	38	39	36	21	174
426	2	2	2	4	4	4	4		22	32	36	40	24	154
427	1	1	1	1	5	5	4		31	35	39	31	18	154
428	4	1	1	3	3	3	3		31	28	35	32	22	148
429	1	2	3	3	5	4	4		28	36	39	38	27	168
430	2	1	2	2	3	3	3		27	34	30	29	23	143
431	1	1	1	1	2	4	2		32	38	40	38	32	180
432	1	1	2	3	2	4	3		32	29	36	38	22	157
433	1	3	3	4	5	5	4		30	35	38	30	20	153
434	2	1	1	3	4	4	4		24	36	40	30	24	154
435	1	3	1	1	5	2	2		32	35	38	40	40	185
436	1	1	2	2	2	4	4		34	39	40	39	21	173
437	1	1	1	2	1	3	2		36	37	40	39	33	185
438	1	1	1	1	1	1	1		32	34	38	37	34	175
439	3	1	2	3	3	4	4		26	34	34	33	21	148
440	1	1	2	3	3	5	4		27	37	39	35	23	161
441	1	3	2	3	2	5	5		30	34	39	37	20	160
442	2	1	1	2	3	4	3		37	38	40	38	30	183
443	1	1	4	5	5	5	5		22	36	40	33	19	150
444	1	2	2	4	3	3	3		29	35	36	37	26	163
445	1	2	2	4	3	4	4		29	32	40	34	26	161
446	3	2	2	3	2	4	4		24	26	33	38	23	144
447	2	1	3	5	5	5	5		24	27	40	38	21	150
448	1	2	2	3	3	4	4		29	33	36	33	24	155
449	3	2	2	4	3	4	4		32	27	32	30	23	144
450	1	1	1	3	4	1	3		33	37	38	38	25	171
451	1	1	2	3	2	4	5		30	35	38	35	21	159
452	1	1	1	3	2	4	4		27	37	40	36	21	161
453	1	1	2	3	2	3	2		31	33	40	35	27	166
454	1	1	2	3	3	4	4		26	28	39	40	22	155
455	2	2	2	3	3	2	4		31	37	37	32	20	157
456	2	3	2	4	3	4	4		32	32	39	34	18	155
457	1	2	2	3	2	4	3		28	33	37	38	24	160
458	2	2	2	3	3	5	4		32	28	30	32	18	140
459	1	3	2	3	3	4	3		32	32	40	35	24	163
460	2	3	1	3	2	4	2		32	33	36	37	26	164
461	1	1	1	4	2	4	4		32	28	38	34	22	154
462	2	2	4	2	3	3	4		31	31	36	34	30	162
463	2	2	2	5	5	4	4		30	33	34	29	25	151
464	1	1	1	3	2	4	1		33	35	38	39	32	177
465	4	1	1	4	4	5	3		20	35	40	35	16	146
466	4	1	2	4	2	4	3		32	33	35	39	25	164
467	1	1	1	1	1	3	3		32	38	40	40	36	186
468	1	2	1	3	1	4	3		21	35	38	32	20	146
469	2	2	2	3	1	2	2		33	31	31	33	34	162
470	1	2	4	4	1	4	4		29	33	36	30	23	151
471	1	2	2	2	2	3	3		31	35	38	37	31	172
472	3	1	2	2	2	3	3		25	31	28	32	25	141
473	1	4	2	4	4	4	4		29	33	33	30	25	150
474	1	2	2	3	2	4	4		26	35	40	35	22	158
475	2	3	2	5	5	5	5		30	35	37	34	21	157
476	2	2	4	2	2	3	3		26	28	30	32	28	144
477	2	1	2	2	5	4	3		32	35	38	39	29	173
478	1	1	2	1	1	5	4		18	37	38	38	20	151
479	1	1	2	3	2	3	4		27	36	38	39	24	164
480	1	2	2	3	2	4	4		30	35	39	33	22	159
481	4	1	3	5	5	5	5		21	34	38	29	15	137
482	4	2	2	3	2	3	4		25	38	39	34	22	158
483	2	3	3	1	3	4	4		26	31	30	30	22	139
484	1	1	2	4	2	3	2		38	34	38	39	28	177
485	2	2	2	2	3	3	3		32	31	30	32	26	151
486	1	1	1	2	2	4	4		34	34	35	32	17	152
487	1	2	1	2	3	3	3		38	40	40	39	34	191
488	4	2	2	4	4	4	4		33	33	37	34	24	161
489	5	1	4	4	4	5	4		20	34	38	32	16	140
490	1	1	1	4	1	3	3		33	31	37	40	30	171
491	4	5	1	1	1	4	3		28	26	30	25	26	135
492	1	3	2	5	5	4	4		33	39	40	39	25	176
493	2	2	2	2	2	2	2		30	31	32	32	30	155
494	1	1	1	4	3	3	4		33	37	40	39	26	175
495	3	2	2	2	3	2	1		29	26	27	30	30	142
496	1	2	4	5	5	5	5		32	31	37	37	19	156
497	2	2	3	4	4	4	4		38	40	40	34	28	180
498	2	2	2	2	1	2	3		32	30	30	32	29	153
499	2	2	2	2	2	2	2		18	26	30	32	30	136
500	1	2	1	2	3	4	2		30	39	37	38	26	170
501	1	2	2	3	3	4	3		30	33	30	32	29	154
502	1	1	3	3	3	4	4		30	32	34	26	23	145
503	2	2	4	4	4	4	4		32	28	30	32	32	154
504	1	1	1	2	3	2	1		28	40	40	38	26	172
505	1	2	3	5	1	4	4		26	32	33	36	22	149
506	1	1	2	2	2	5	2		31	40	38	36	32	177
507	2	2	2	4	3	4	4		32	31	30	31	23	147
508	1	1	2	1	2	4	4		31	37	39	39	25	171
509	2	2	2	3	3	4	4		32	27	30	28	20	137
510	1	3	1	1	2	3	4		31	34	36	39	29	169
511	2	2	2	2	2	2	2		31	32	32	32	30	157
512	1	1	2	4	4	4	4		32	37	39	38	22	168
513	1	2	3	4	3	4	3		28	24	30	30	20	132
514	2	2	2	2	2	2	2		30	32	32	32	30	156
515	1	1	1	2	4	4	2		27	38	40	35	28	168
516	1	2	2	3	3	3	3		30	35	36	37	33	171
517	1	1	2	1	4	3	4		37	35	39	37	28	176
518	2	4	2	4	3	4	4		28	27	20	29	31	135
519	2	3	4	4	3	5	4		30	34	30	33	20	147
520	5	5	3	2	4	2	3		38	23	24	20	20	125
521	3	3	3	3	3	4	4		31	27	37	34	28	157
522	2	2	2	3	2	4	4		28	30	36	36	21	151
523	1	1	1	1	2	5	3		40	38	38	40	40	196
524	1	1	2	3	3	5	4		30	34	33	33	17	147
525	1	1	2	1	1	4	4		19	31	37	37	25	149
526	2	2	2	4	3	3	2		35	34	37	37	24	167
527	1	1	1	4	3	3	3		31	37	36	40	27	171
528	1	1	2	4	3	4	4		31	40	40	35	25	171
529	1	1	2	2	3	5	3		29	32	31	36	18	146
530	2	2	3	2	2	3	3		31	27	29	28	27	142
531	5	5	5	5	5	5	5		26	30	28	25	18	127
532	1	2	2	1	3	2	2		33	28	35	35	33	164
533	1	1	1	4	3	1	1		34	34	36	40	40	184
534	1	1	1	3	4	3	3		35	38	38	40	26	177
535	1	1	2	3	4	4	3		32	35	38	36	26	167
536	1	1	1	1	3	3	4		22	36	30	32	22	142
537	1	2	1	4	3	3	3		33	34	39	38	27	171
538	1	1	1	3	2	4	4		31	34	38	35	23	161
539	1	3	3	4	5	3	3		24	24	28	26	20	122
540	1	1	1	2	1	2	3		40	40	40	40	40	200
541	1	1	1	4	3	1	1		40	32	36	40	36	184
542	1	1	1	2	3	4	4		20	32	39	39	26	156
543	1	1	1	4	2	4	3		30	26	24	28	23	131
544	1	1	1	1	3	2	2		32	39	40	40	34	185
545	1	1	1	4	3	4	3		25	32	36	36	20	149
546	1	1	1	1	3	5	3		25	39	29	24	32	149
547	1	3	3	4	3	4	2		32	26	40	36	25	159
548	1	1	1	3	3	4	4		32	33	39	40	32	176
549	1	1	1	3	3	4	4		34	35	39	33	23	164
550	1	2	2	5	5	4	3		31	33	40	34	21	159
551	1	1	2	2	2	2	2		24	26	26	26	26	128
552	2	2	3	4	2	4	4		26	35	33	32	19	145
553	1	1	3	4	1	4	4		23	22	27	33	26	131
554	1	2	2	3	4	3	3		39	32	31	36	28	166
555	1	2	2	4	3	3	3		29	33	35	35	21	153
556	1	1	1	4	4	3	4		40	40	40	40	40	200
557	1	3	2	3	1	5	4		20	35	40	29	19	143
558	1	1	2	1	2	4	3		27	26	40	37	23	153
559	1	1	1	1	5	4	3		33	40	40	36	26	175
560	1	1	1	3	1	5	4		32	29	39	39	27	166
561	1	3	2	3	2	5	3		26	38	40	36	25	165
562	1	1	2	3	3	4	4		33	30	40	40	24	167
563	3	3	3	3	3	3	3		26	26	26	26	24	128
564	1	1	2	4	5	5	5		27	26	38	33	24	148
565	2	2	2	4	3	4	4		29	27	25	32	28	141
566	2	3	3	3	3	3	3		23	24	24	24	27	122
567	3	3	2	3	5	4	4		36	25	21	31	22	135
568	2	2	1	4	3	4	4		32	39	40	40	28	179
569	1	1	1	1	1	1	4		34	19	28	30	37	148
570	1	1	1	4	2	4	3		39	40	40	40	26	185
571	1	1	1	2	2	3	3		40	40	40	40	33	193
572	1	1	1	2	4	4	2		29	40	40	30	20	159
573	1	1	1	1	4	4	2		31	35	40	40	23	169
574	4	3	2	2	3	4	4		32	25	28	33	31	149
575	1	3	2	3	4	5	3		29	34	36	33	22	154
576	1	1	1	3	3	4	4		25	39	37	37	19	157
577	2	2	2	2	2	2	2		33	32	32	32	30	159
578	2	2	2	2	3	4	4		29	38	40	35	24	166
579	1	1	2	4	3	5	5		31	31	32	32	23	149
580	1	1	1	1	1	2	3		40	40	40	40	36	196
581	1	1	1	2	5	5	4		35	30	37	36	25	163
582	1	2	3	2	1	3	3		23	32	30	37	29	151
583	1	1	1	2	2	4	2		31	34	38	40	30	173
584	1	1	1	1	1	1	1		24	32	39	35	24	154
585	4	4	4	2	4	4	2		24	19	24	26	25	118
586	1	1	1	2	5	5	3		34	33	36	29	18	150
587	1	1	1	1	1	3	2		32	31	36	40	28	167
588	1	1	1	2	3	3	2		34	38	40	40	28	180
589	3	3	3	3	3	3	3		32	32	32	32	25	153
590	1	1	1	2	2	4	4		38	37	40	39	32	186
591	1	2	2	3	3	4	4		29	33	39	34	19	154
592	1	1	1	2	1	5	4		38	36	39	38	38	189
593	2	2	2	4	3	2	2		23	25	32	32	30	142
594	2	2	2	2	2	2	2		32	32	32	32	31	159
595	1	1	1	4	3	2	2		24	38	40	40	30	172
596	2	2	2	4	4	4	4		32	30	32	32	28	154
597	1	2	2	3	2	4	3		27	35	36	33	28	159
598	1	1	2	4	3	4	4		25	37	36	38	22	158
599	1	1	2	4	4	5	4		19	29	35	34	20	137
600	3	3	3	2	3	4	2		24	28	27	24	26	129
601	1	1	1	2	2	4	4		33	36	40	38	29	176
602	2	2	2	4	4	4	4		30	32	31	30	24	147
603	2	3	2	4	2	4	3		29	38	34	34	25	160
604	2	2	2	2	2	3	3		28	32	29	28	32	149
605	2	2	2	3	3	4	4		29	35	40	40	26	170
606	1	3	2	5	5	5	5		11	32	40	32	17	132
607	2	2	2	2	3	4	4		28	28	32	32	19	139
608	2	3	2	3	3	4	4		30	35	37	35	23	160
609	2	2	2	3	4	5	4		25	31	36	30	16	138
610	1	1	2	4	2	4	3		23	36	40	39	26	164
611	2	2	2	2	4	4	4		31	32	32	32	26	153
612	1	1	2	3	3	3	2		27	32	37	30	19	145
613	3	3	3	3	3	3	3		26	26	26	26	24	128
614	1	1	1	2	2	4	4		32	34	39	40	30	175
615	2	2	2	2	2	2	2		32	32	32	32	31	159
616	1	2	2	2	2	2	1		32	30	31	36	31	160
617	1	2	2	2	3	3	3		32	32	33	32	27	156
618	1	1	2	2	3	4	3		26	39	40	38	26	169
619	1	2	2	4	1	4	4		21	36	37	35	23	152
620	2	2	2	2	2	2	2		27	32	32	32	30	153
621	4	4	4	4	4	4	4		23	24	27	30	21	125
622	1	2	2	2	2	2	2		32	36	40	36	29	173
623	2	3	2	1	4	4	3		32	34	33	31	23	153
624	2	2	3	2	3	2	2		30	30	37	34	25	156
625	1	1	1	2	5	5	4		20	30	38	35	21	144
626	1	1	1	1	3	4	4		23	37	40	40	21	161
627	1	2	1	1	1	2	1		32	32	32	32	22	150
628	1	1	1	2	2	2	1		40	40	40	40	37	197
629	1	2	2	4	4	4	4		31	35	39	34	21	160
630	1	1	1	1	1	2	1		26	39	39	39	40	183
631	2	2	2	1	2	3	3		31	32	32	32	30	157
632	3	3	2	4	3	3	3		30	31	32	32	26	151
633	1	1	1	4	2	3	3		28	27	37	40	27	159
634	1	1	2	4	5	5	5		32	30	32	32	21	147
635	2	2	2	4	4	4	4		28	35	35	40	25	163
636	1	1	1	2	1	2	1		39	40	40	40	38	197
637	2	2	2	2	2	3	3		29	33	32	32	30	156
638	1	1	1	1	1	3	3		31	33	36	40	29	169
639	2	1	2	5	3	4	5		23	28	33	31	21	136
640	1	4	2	5	3	4	4		32	32	32	32	20	148
641	1	1	1	1	2	5	1		30	36	35	40	40	181
642	1	1	2	3	2	3	2		34	35	40	35	30	174
643	2	2	2	2	2	2	2		39	40	32	32	30	173
644	1	2	2	3	2	5	3		24	30	32	34	18	138
645	1	1	2	3	2	4	5		25	36	38	36	18	153
646	1	1	1	2	1	2	1		32	35	39	40	36	182
647	1	1	2	1	2	4	3		28	36	40	39	21	164
648	3	3	3	3	3	3	3		16	27	26	24	29	122
649	2	2	2	2	2	2	2		32	32	33	32	30	159
650	1	1	1	4	1	1	1		28	24	24	40	40	156
651	1	2	2	3	3	3	3		32	28	30	32	17	139
652	1	3	3	3	3	3	5		27	36	36	26	24	149
653	1	1	1	1	4	2	2		32	36	39	36	28	171
654	1	1	1	5	5	4	3		34	39	36	40	30	179
655	1	1	1	1	1	1	1		40	40	40	40	35	195
656	1	1	3	3	3	3	1		31	24	36	24	28	143
657	1	1	1	3	3	3	3		27	29	36	40	27	159
658	3	5	4	3	4	3	4		21	25	24	23	26	119
659	1	2	2	4	3	3	5		36	34	38	36	33	177
660	1	1	1	2	5	3	2		37	37	40	40	31	185
661	1	1	1	2	2	3	2		32	40	39	38	31	180
662	1	2	2	2	2	4	4		32	34	37	37	20	160
663	1	1	1	1	2	3	3		37	35	34	37	25	168
664	1	1	1	1	1	1	1		40	37	34	37	36	184
665	1	2	3	4	3	2	3		29	34	29	28	32	152
666	2	2	2	4	3	4	4		29	28	29	30	23	139
667	1	1	1	3	1	3	3		30	32	32	32	25	151
668	2	2	2	4	2	3	4		33	32	32	32	24	153
669	1	1	1	1	1	4	3		28	34	36	39	28	165
670	1	1	1	1	1	2	1		40	40	40	40	35	195
671	1	2	2	3	2	2	2		35	36	40	32	38	181
672	1	1	2	3	2	2	2		32	37	40	38	30	177
673	1	1	1	4	1	1	1		32	32	32	32	29	157
674	1	2	1	4	2	3	2		35	39	38	40	33	185
675	1	2	3	4	3	3	3		31	35	37	38	26	167
676	1	1	2	2	2	5	5		30	37	40	35	19	161
677	2	2	2	2	2	2	2		32	32	33	32	30	159
678	2	1	1	2	2	3	2		30	29	32	32	28	151
679	2	2	2	4	4	4	4		24	28	30	32	25	139
680	2	3	4	4	4	4	3		29	31	31	28	21	140
681	4	2	4	3	2	2	4		32	32	30	32	28	154
682	2	2	2	4	2	2	2		32	34	32	32	34	164
683	3	3	3	4	4	2	3		24	31	35	35	29	154
684	1	1	1	2	1	1	5		40	40	36	40	36	192
685	1	1	2	4	3	3	3		32	37	36	39	22	166
686	2	2	3	2	3	3	2		27	28	30	35	24	144
687	1	4	2	2	1	1	1		38	34	39	34	34	179
688	2	2	3	4	2	3	3		31	36	30	32	28	157
689	4	4	3	4	3	4	2		32	39	40	39	23	173
690	1	1	1	1	5	1	3		31	35	35	35	29	165
691	1	1	1	4	2	4	4		36	28	34	36	19	153
692	1	1	1	3	4	4	5		32	38	40	40	30	180
693	1	2	2	1	3	3	2		32	34	35	32	27	160
694	1	1	1	4	2	4	3		27	29	36	39	15	146
695	1	1	3	5	5	4	5		25	36	40	37	22	160
696	1	1	1	4	2	4	2		32	34	40	38	26	170
697	2	2	2	1	3	4	4		32	32	33	32	30	159
698	3	3	3	3	3	3	3		31	27	36	29	25	148
699	1	3	1	5	4	4	1		32	40	36	40	30	178
700	1	1	1	1	1	2	1		40	40	40	40	36	196
701	2	2	2	2	2	2	2		28	32	32	32	30	154
702	2	4	4	4	2	2	2		24	25	23	29	24	125
703	1	2	3	4	2	4	3		26	30	30	32	21	139
704	2	2	2	4	4	4	4		17	23	24	24	24	112
705	2	2	2	5	4	5	4		32	34	39	36	22	163
706	1	2	2	3	2	3	2		34	37	38	38	30	177
707	2	2	2	4	4	4	4		30	30	39	28	18	145
708	1	1	2	4	4	5	4		23	28	29	36	22	138
709	1	1	2	2	2	2	2		32	35	38	37	28	170
710	2	3	3	3	3	3	4		26	24	38	33	26	147
711	1	1	1	3	3	3	1		39	37	39	39	30	184
712	1	1	1	2	1	2	5		37	37	36	36	33	179
713	2	3	2	4	2	4	5		26	39	37	37	23	162
714	2	2	3	3	4	4	4		32	30	32	33	17	144
715	1	1	1	4	2	4	1		38	39	40	39	28	184
716	1	2	2	4	1	2	2		32	34	34	32	32	164
717	2	2	2	1	4	4	2		29	27	23	32	30	141
718	1	1	2	3	4	3	3		32	32	34	32	29	159
719	1	2	2	4	3	4	3		32	29	35	39	21	156
720	1	3	2	4	3	4	2		24	36	34	31	26	151
721	1	1	2	4	5	5	3		21	31	35	35	18	140
722	1	1	2	2	2	4	4		37	27	37	38	24	163
723	1	1	1	4	3	4	2		35	38	39	39	28	179
724	1	2	3	3	2	3	1		22	30	35	38	28	153
725	1	3	3	4	4	5	4		39	33	37	29	19	157
726	1	1	2	2	3	3	2		32	36	33	34	25	160
727	1	1	1	2	4	4	5		34	36	40	39	29	178
728	1	1	1	4	5	5	4		22	33	36	40	29	160
729	1	3	2	5	4	4	2		32	22	33	32	29	148
730	3	3	4	4	5	3	4		22	27	24	25	20	118
731	1	3	2	5	5	5	4		32	34	40	37	26	169
732	1	1	1	1	2	1	3		39	40	40	40	35	194
733	2	2	2	2	2	2	2		32	32	32	32	30	158
734	2	3	3	5	4	4	4		28	31	33	27	21	140
735	3	1	1	3	3	3	4		37	38	40	38	29	182
736	1	2	1	3	4	5	4		31	29	40	37	22	159
737	1	1	2	5	5	1	4		22	32	39	36	19	148
738	1	2	1	3	2	4	2		32	32	32	32	30	158
739	1	3	3	4	4	5	4		28	34	39	33	19	153
740	1	3	3	5	5	5	4		24	30	27	28	21	130
741	2	3	3	4	5	5	5		33	30	34	28	16	141
742	1	2	2	5	4	5	5		29	29	30	29	21	138
743	1	2	4	4	3	3	3		22	34	40	34	25	155
744	1	1	3	4	4	4	4		34	33	35	29	25	156
745	1	1	1	2	3	3	2		30	35	40	40	26	171
746	1	2	1	4	5	5	3		32	29	34	38	24	157
747	1	1	1	1	2	1	1		31	35	39	38	39	182
748	1	1	2	2	3	4	4		31	37	35	30	19	152
749	1	3	4	4	4	5	4		28	30	37	25	15	135
750	3	3	3	3	3	3	3		26	34	40	40	32	172
751	1	1	1	3	1	4	3		26	29	40	40	32	167
752	1	1	3	4	3	4	5		31	35	38	38	23	165
753	1	2	2	2	2	4	3		24	34	39	34	23	154
754	1	2	1	2	4	4	3		32	38	40	39	29	178
755	1	1	1	3	5	4	5		28	37	34	38	32	169
756	1	1	1	1	4	1	4		34	34	36	36	22	162
757	1	1	1	3	1	3	3		29	39	37	35	26	166
758	1	1	1	3	3	2	4		24	28	40	40	37	169
759	1	1	1	2	3	2	2		28	33	39	39	30	169
760	2	2	2	4	2	3	3		29	31	30	30	28	148
761	1	3	4	5	4	4	4		21	36	39	31	24	151
762	2	2	2	4	4	4	2		32	32	32	32	27	155
763	1	1	1	4	4	4	4		27	32	40	38	23	160
764	1	1	1	1	3	4	1		32	32	33	40	24	161
765	1	2	2	4	3	4	4		29	30	35	39	31	164
766	2	2	1	4	4	4	4		24	29	31	27	19	130
767	1	1	1	4	1	1	2		20	28	38	38	32	156
768	1	1	1	1	5	4	4		27	30	37	35	23	152
769	1	1	1	4	2	4	5		32	31	39	37	21	160
770	1	1	1	1	2	3	4		21	30	39	40	22	152
771	1	2	2	2	2	4	4		35	36	40	37	22	170
772	3	2	4	1	4	5	4		27	27	32	32	15	133
773	1	1	2	2	4	4	2		16	32	39	40	27	154
774	1	3	1	3	3	3	3		25	33	39	33	27	157
775	1	1	2	2	2	3	3		33	36	34	39	27	169
776	1	1	2	2	4	3	4		32	29	34	31	22	148
777	1	2	2	3	3	4	1		31	34	35	34	24	158
778	2	1	2	1	4	1	3		29	32	32	30	18	141
779	1	1	1	4	4	5	4		17	35	40	40	19	151
780	1	2	2	3	3	4	4		24	37	37	34	23	155
781	1	3	2	2	2	2	3		32	34	31	35	26	158
782	1	1	1	4	3	5	2		30	38	39	38	26	171
783	3	3	3	3	3	3	3		8	36	40	30	24	138
784	1	3	2	4	4	5	4		32	29	34	29	23	147
785	2	3	2	3	3	3	3		30	34	40	38	27	169
786	1	1	1	3	3	4	4		40	40	32	32	24	168
787	1	1	5	5	5	5	5		27	36	40	29	18	150
788	1	1	2	2	4	4	4		32	36	40	39	27	174
789	2	2	2	5	3	5	5		16	18	24	32	25	115
790	1	3	2	5	2	4	2		32	40	40	39	33	184
791	1	1	2	1	1	4	4		31	39	40	37	24	171
792	1	3	2	1	1	3	3		33	38	40	37	22	170
793	1	3	2	5	3	4	4		20	34	40	39	24	157
794	1	1	1	2	2	3	3		28	33	37	38	26	162
795	3	3	3	4	3	3	1		32	32	32	32	25	153
796	2	2	2	2	2	1	2		27	30	32	32	30	151
797	2	2	2	2	2	2	2		16	32	32	32	25	137
798	1	1	1	1	1	1	1		30	32	32	32	24	150
799	2	2	2	4	2	3	2		30	36	38	40	34	178
800	2	2	2	2	2	2	2		32	32	32	32	34	162
801	1	1	1	3	1	5	3		39	40	38	38	38	193
802	1	1	2	5	3	4	4		32	39	40	39	24	174
803	2	2	2	4	3	4	4		32	32	32	32	29	157
804	1	1	1	3	4	3	3		27	38	38	39	27	169
805	2	2	2	2	2	2	2		25	32	32	32	30	151
806	1	1	2	4	2	5	4		26	30	33	29	25	143
807	1	2	2	1	1	3	2		36	33	40	34	30	173
808	1	1	1	5	4	4	3		31	27	34	37	26	155
809	1	1	1	1	2	1	1		30	40	40	40	36	186
810	1	1	1	2	2	3	3		27	38	37	40	27	169
811	1	1	2	2	3	4	4		26	38	38	38	25	165
812	1	1	1	2	2	2	2		37	39	38	40	36	190
813	1	1	1	1	3	1	1		33	39	40	38	40	190
814	1	2	2	3	3	3	1		32	34	37	35	23	161
815	1	1	1	3	2	2	3		37	40	40	39	32	188
816	1	1	1	3	3	2	1		40	39	40	40	38	197
817	1	1	1	4	1	3	1		31	40	40	40	30	181
818	1	1	2	1	3	3	3		31	32	32	32	25	152
819	1	1	1	2	4	4	1		33	37	40	40	30	180
820	2	2	2	3	3	3	3		40	40	40	39	34	193
821	1	1	1	1	1	1	4		40	40	40	38	36	194
822	3	3	3	4	1	2	1		40	40	40	38	28	186
823	1	2	1	4	4	4	4		31	32	35	36	20	154
824	1	1	1	1	1	1	1		40	37	40	40	36	193
825	2	1	1	2	1	2	2		40	40	40	40	32	192
826	1	1	1	1	1	1	1		39	40	40	40	35	194
827	1	1	1	1	1	1	5		40	40	38	38	36	192
828	2	2	2	2	2	2	2		40	40	40	40	30	190
829	1	1	1	1	3	5	3		38	39	40	40	39	196
830	1	1	1	1	1	4	2		38	23	37	40	30	168
831	2	2	2	2	2	2	2		40	40	40	40	33	193
832	1	1	1	1	1	2	2		37	37	38	34	34	180
833	1	1	1	3	2	3	1		39	40	40	40	35	194
834	3	3	3	3	3	5	1		28	32	32	32	25	149
835	2	2	2	1	2	2	2		32	32	32	32	30	158
836	1	1	1	3	1	3	3		32	32	32	32	27	155
837	1	1	1	2	3	2	1		37	40	40	39	39	195
838	2	2	2	2	2	2	2		32	32	32	32	30	158
839	1	2	2	3	4	3	3		32	38	38	38	32	178
840	1	2	1	4	2	2	1		33	32	32	36	17	150
841	1	1	1	1	1	5	1		36	39	32	34	33	174
842	5	5	5	5	5	2	5		27	29	25	22	25	128
843	1	1	3	1	1	1	1		28	33	36	34	27	158
844	1	2	2	3	2	3	3		31	32	32	34	30	159
845	2	2	3	3	1	2	1		32	35	28	36	34	165
846	2	2	2	1	2	4	4		32	32	32	28	27	151
847	1	1	1	1	2	2	2		34	38	40	38	30	180
848	2	2	2	1	2	2	1		32	32	32	32	30	158
849	1	1	2	1	2	4	3		32	37	40	38	24	171
850	1	1	2	3	3	3	2		37	37	39	36	31	180
851	2	2	2	2	2	1	2		32	32	32	32	30	158
852	1	1	1	1	1	2	1		40	40	40	40	38	198
853	1	1	1	2	1	2	3		40	40	40	40	39	199
854	2	2	2	4	2	2	2		32	33	34	32	30	161
855	2	2	2	1	1	2	2		28	33	32	32	30	155
856	4	4	4	1	2	4	4		18	32	32	32	20	134
857	1	1	2	2	2	3	2		36	35	34	35	31	171
858	2	1	2	3	2	3	4		32	32	32	32	30	158
859	1	1	1	3	3	3	3		29	34	38	33	28	162
860	2	2	2	3	2	2	2		32	32	32	32	30	158
861	1	1	1	4	2	3	4		30	39	38	40	39	186
862	5	5	2	2	4	2	1		20	39	40	37	23	159
863	5	5	3	4	2	2	3		37	40	40	40	28	185
864	2	1	3	3	4	1	1		28	30	34	39	20	151
865	2	2	2	2	3	4	4		34	35	36	33	25	163
866	1	1	1	1	2	3	2		31	32	37	32	24	156
867	3	5	4	5	5	5	4		36	36	37	38	33	180
868	1	1	1	3	2	3	3		32	36	37	34	26	165
869	1	1	1	3	5	5	3		36	35	35	35	31	172
870	1	2	2	4	2	4	4		36	35	37	38	35	181
871	1	1	1	3	3	4	5		36	37	39	38	32	182
872	1	2	2	3	3	3	3		33	30	33	33	28	157
873	2	2	2	4	4	4	1		24	29	32	25	24	134
874	1	2	1	4	4	3	2		34	35	39	38	31	177
875	1	2	2	2	3	3	3		34	39	38	36	33	180
876	1	1	1	2	1	1	1		30	32	35	36	23	156
877	1	1	1	4	3	5	5		29	34	34	37	26	160
878	1	1	1	3	1	3	3		27	30	30	29	20	136
879	1	1	1	3	1	4	3		26	32	35	32	23	148
880	2	1	2	5	5	4	2		27	25	26	31	20	129
881	2	2	2	3	3	4	4		34	31	33	33	26	157
882	1	2	2	4	4	4	5		28	34	37	36	28	163
883	1	1	1	2	3	4	3		29	28	36	35	26	154
884	1	1	1	1	3	5	3		30	36	37	35	24	162
885	1	1	2	5	3	5	5		34	36	36	37	27	170
886	1	1	1	1	2	4	4		25	33	35	31	21	145
887	1	1	2	3	3	5	5		35	36	35	33	26	165
888	1	1	2	3	3	5	4		32	36	37	38	30	173
889	1	1	1	4	4	4	4		34	37	39	40	31	181
890	1	3	3	1	4	5	3		32	34	35	32	24	157
891	1	2	2	3	3	5	5		26	34	34	36	24	154
892	2	3	3	4	4	1	4		32	32	35	33	23	155
893	1	2	2	2	3	3	1		27	28	35	37	27	154
894	1	2	2	3	3	4	4		36	35	37	35	25	168
895	1	1	1	2	2	3	3		36	39	39	39	28	181
896	1	1	2	4	4	4	4		28	35	38	35	25	161
897	1	1	2	3	3	3	1		31	33	34	34	25	157
898	2	1	2	5	5	5	4		30	35	33	29	19	146
899	1	1	1	4	3	5	3		37	35	35	32	26	165
900	1	2	2	1	1	3	3		32	32	36	36	25	161
901	1	3	3	1	4	4	4		28	35	36	38	25	162
902	2	2	4	4	2	4	4		25	24	36	28	23	136
903	1	1	1	3	1	2	2		38	36	39	38	34	185
904	1	3	3	3	3	5	1		24	24	26	31	18	123
905	1	1	1	1	2	4	3		34	37	38	37	26	172
906	1	1	2	2	4	4	4		35	32	38	37	27	169
907	1	2	2	4	4	5	1		29	31	38	34	24	156
908	1	2	2	5	3	2	2		33	29	39	37	22	160
909	1	1	2	3	2	3	3		34	37	38	37	31	177
910	1	2	2	4	4	4	2		34	35	40	39	33	181
911	2	1	2	1	3	3	3		30	34	37	34	31	166
912	1	3	2	3	4	4	4		33	38	38	37	30	176
913	1	2	2	3	2	3	3		37	37	36	38	30	178
914	1	4	2	5	4	5	2		29	25	31	29	19	133
915	1	2	2	2	3	4	4		23	38	38	32	26	157
916	1	1	1	4	5	4	4		25	29	33	34	24	145
917	1	1	1	4	4	4	3		35	37	39	39	31	181
918	1	3	2	4	5	4	3		35	37	37	38	30	177
919	1	1	1	4	4	5	4		35	35	39	40	29	178
920	1	1	2	1	1	4	3		24	30	36	33	30	153
921	1	1	1	3	4	4	4		26	38	39	37	30	170
922	1	2	1	4	1	4	4		29	26	36	37	23	151
923	1	1	1	1	4	4	4		23	34	36	34	19	146
924	2	2	3	4	5	5	3		34	36	38	36	24	168
925	1	2	3	5	3	3	3		26	31	30	34	26	147
926	1	2	1	4	4	4	2		35	31	33	35	27	161
927	1	1	1	5	4	2	2		39	38	39	36	32	184
928	1	1	1	1	2	1	1		30	33	37	34	32	166
929	1	1	1	1	3	3	3		25	31	37	36	26	155
930	1	2	2	4	4	1	4		29	27	31	29	30	146
931	1	1	1	3	5	3	4		37	34	39	38	34	182
932	1	2	1	3	3	3	3		20	30	36	32	17	135
933	1	1	1	1	1	5	3		35	36	37	38	32	178
934	4	3	3	5	5	5	4		34	34	38	36	30	172
935	2	3	2	1	2	2	2		28	30	34	34	17	143
936	2	2	3	3	3	3	3		23	30	29	23	21	126
937	1	1	1	4	5	4	4		33	34	37	34	24	162
938	1	1	1	4	3	3	3		31	33	34	34	29	161
939	1	2	2	4	3	4	4		36	37	35	38	31	177
940	1	1	1	5	5	5	5		26	35	37	39	21	158
941	1	1	1	3	3	4	3		28	31	34	33	26	152
942	1	1	2	2	2	4	4		23	32	34	30	27	146
943	1	1	1	3	3	4	4		37	38	39	38	35	187
944	1	2	2	4	2	4	1		23	32	36	30	23	144
945	1	1	1	4	4	4	4		35	33	37	37	28	170
946	1	2	2	5	4	4	4		23	32	35	31	22	143
947	2	2	3	1	3	4	1		25	29	34	30	23	141
948	1	2	2	5	4	5	3		36	36	37	40	33	182
949	1	2	3	4	3	1	4		28	30	33	30	19	140
950	3	3	3	2	2	3	3		18	34	35	37	29	153
951	2	2	2	3	3	4	3		31	36	39	38	28	172
952	1	2	2	1	3	3	1		31	24	28	24	23	130
953	1	1	1	1	3	3	3		28	31	36	36	24	155
954	1	2	2	4	2	4	4		34	36	38	40	32	180
955	2	1	1	1	1	1	1		36	34	34	33	29	166
956	1	1	2	1	2	2	2		32	36	39	37	32	176
957	1	1	2	4	4	4	4		34	36	39	37	25	171
958	1	3	2	3	2	5	4		35	38	39	39	35	186
959	1	1	2	3	1	4	1		26	27	36	33	21	143
960	1	1	2	3	5	1	4		29	27	37	34	20	147
961	1	1	2	3	2	2	1		31	35	39	37	26	168
962	1	2	2	2	3	4	3		26	32	35	32	21	146
963	1	1	1	3	3	4	3		28	31	30	35	21	145
964	1	1	1	3	3	5	5		31	34	36	35	20	156
965	1	2	2	3	4	4	4		25	31	35	32	21	144
966	1	1	2	4	3	4	3		38	39	37	38	37	189
967	1	2	2	4	4	4	4		33	32	35	35	29	164
968	1	1	2	1	2	3	3		34	35	40	38	31	178
969	1	3	2	4	2	4	4		33	31	36	34	24	158
970	1	3	2	3	5	4	3		29	39	40	38	32	178
971	1	1	1	2	1	3	2		34	34	37	36	28	169
972	2	2	2	1	4	4	4		20	29	37	26	20	132
973	1	1	1	3	5	4	4		36	36	38	37	28	175
974	1	3	4	2	3	5	4		34	36	38	32	26	166
975	1	2	1	2	4	4	5		34	33	37	35	26	165
976	1	3	2	3	3	3	4		36	38	36	38	32	180
977	2	1	2	4	3	3	1		28	33	38	34	24	157
978	2	2	2	2	4	4	2		30	34	33	33	28	158
979	1	1	2	3	3	5	2		32	32	38	37	30	169
980	1	1	2	4	4	5	4		30	35	37	36	26	164
981	1	1	1	3	3	5	5		34	37	38	37	34	180
982	1	2	2	3	2	1	5		31	32	36	34	26	159
983	1	1	1	3	2	4	2		34	35	38	37	31	175
984	1	1	1	5	1	4	3		27	27	31	26	18	129
985	2	2	2	5	3	5	4		36	34	36	38	30	174
986	2	2	2	4	3	4	4		28	31	34	30	23	146
987	2	2	4	4	4	5	4		31	35	37	36	28	167
988	1	1	1	3	3	3	4		34	39	37	38	30	178
